# Index Cases First Identified by Nasal-Swab Rapid COVID-19 Tests Had More Transmission to Household Contacts Than Cases Identified by Other Test Types

Jenny Ji<sup>1†</sup>, Alexander Vilorio Winnett BS<sup>1,2†</sup>, Natasha Shelby PhD<sup>1</sup>, Jessica A. Reyes MPH<sup>1</sup>, Noah W. Schlenker BS<sup>1</sup>, Hannah Davich MPH<sup>1</sup>, Saharai Caldera BS<sup>1</sup>, Colten Tognazzini BSN<sup>3</sup>, Ying-Ying Goh MD MPH<sup>3</sup>, Matt Feaster PhD MPH<sup>3</sup>, Rustem F. Ismagilov PhD<sup>1\*</sup>

1. California Institute of Technology, Pasadena, CA, USA
2. University of California Los Angeles – California Institute of Technology Medical Scientist Training Program, Los Angeles, CA USA
3. Pasadena Public Health Department, Pasadena, CA, USA

† These authors contributed equally to this report.

\*Correspondence to: Rustem F. Ismagilov, 1200 E. California Blvd., Pasadena, CA 91125, 626-395-8130, [rustem.admin@caltech.edu](mailto:rustem.admin@caltech.edu)

## ABSTRACT

**Importance:** At-home rapid COVID-19 tests utilize nasal-swab specimens and require high viral loads to reliably give positive results. Longitudinal studies from the onset of infection have found infectious virus can present in oral specimens days before nasal. Detection and initiation of infection-control practices may therefore be delayed when nasal-swab rapid tests are used, resulting in greater exposure and transmission to contacts. **Objective:** We assessed whether index cases first identified by rapid nasal-swab COVID-19 tests had more transmission to household contacts than index cases who used other test types (tests with higher analytical sensitivity but longer turnaround times, and/or that utilize non-nasal specimen types). **Design:** In this observational cohort study, members of households with a recent COVID-19 case were screened for infection at least daily by RT-qPCR on one or more self-collected upper-respiratory specimen types. Participants reported demographic/medical information (including COVID-19 testing), symptom and exposure information, and household infection-control practices. A two-level random intercept model was used to assess the association between the infection outcome of household contacts and each covariable (household size, race/ethnicity, age, vaccination status, viral variant, infection-control practices, and whether a rapid nasal-swab test was used to initially identify the household index case). **Setting:** Southern California, September 2020—June 2021 and November 2021—March 2022. **Participants:** Cohort of 370 individuals from 85 households. **Main Outcome(s) and Measure(s):** Transmission was quantified by adjusted secondary attack rates (aSAR) and adjusted odds ratios (aOR). **Results:** An aSAR of 53.6% (95% CI 38.8–68.3%) was observed among households where the index case first tested positive by a rapid nasal-swab COVID-19 test, which was significantly higher than the aSAR for households where the index case utilized another test type (27.2% 95% CI 19.5–35.0%,  $P=0.003$  pairwise comparisons of predictive margins). We observed an aOR of 4.90 (95% CI 1.65–14.56) for transmission to household contacts when a nasal-swab rapid test was used to identify the index case, compared to other test types. **Conclusions and Relevance:** Use of nasal-swab rapid COVID-19 tests for initial detection of infection and initiation of infection control may not limit transmission as well as other test types.

**Keywords:** Household, Transmission, Rapid, Nasal, Antigen, Swabs, Omicron, Secondary Attack Rate, Delta, Southern California variant, association

## Key Points:

**1. Question:** Does identification of index cases by rapid nasal-swab tests limit household transmission of SARS-CoV-2 as well as other test types?

**2. Finding:** Significantly higher adjusted secondary attack rates and adjusted odds ratios for transmission were observed in households where the index case used a nasal rapid COVID-19 test for initial detection versus other test types.

**3. Meaning:** The use of nasal-swab rapid COVID-19 tests for initial detection of infection and initiation of infection control may not limit transmission as well as other test types.

NOTE: This preprint reports new research that has not been certified by peer review and should not be used to guide clinical practice.

## Introduction

The majority of SARS-CoV-2 transmission events occur among household contacts.<sup>1,2</sup> Numerous studies have characterized household transmission of SARS-CoV-2<sup>3-8</sup> and identified factors that modulate the risk of transmission within households, such as larger household size being associated with higher risk.<sup>9-12</sup> Similarly, disparities by race and ethnicity have been observed, while controlling for socioeconomic differences.<sup>11,13</sup> Age of both the index case (first person in the household to become infected) and at-risk household contacts (who either remain uninfected or become infected secondary cases) has also been implicated in SARS-CoV-2 household-transmission patterns.<sup>6,14-16</sup> Furthermore, although vaccination does not fully prevent breakthrough infections,<sup>17</sup> vaccination has been shown to be protective and decrease the risk of infection<sup>8,18-22</sup>. Specific infection-control practices, such as wearing a mask around infected contacts, physical distancing, and quarantining sick individuals have also shown protective effects.<sup>14,18,23-25</sup> Lastly, SARS-CoV-2 variants such as Delta and Omicron have been shown in large studies to have greater transmissibility compared with ancestral variants.<sup>8,18,19,26-33</sup>

Early identification of an infectious individual is a critical step to reduce subsequent transmission, including within households. Because transmission of SARS-CoV-2 occurs during both the asymptomatic and symptomatic periods of infection,<sup>34-37</sup> diagnostic testing to quickly prompt infection control practices has been effective to limit additional exposures and transmission.<sup>38</sup> Conversely, infectious individuals that go unidentified or delay identification allow for greater exposure to contacts and thereby more transmission.<sup>12,39,40</sup>

Delayed detection can occur due to test turnaround times or when a test yields a false-negative result. Rapid tests (e.g., antigen and some molecular tests) offer fast turnaround times, but require higher levels of virus to reliably result positive; e.g., ~100,000 times more virus is needed to yield a positive result by the LumiraDx SARS-CoV-2 Ag Test than the PerkinElmer New Coronavirus Nucleic Acid Detection Kit<sup>41,42</sup>. Additionally, SARS-CoV-2 can infect different upper-respiratory compartments, so numerous specimen types are used to detect infection (e.g., anterior-nares nasal swab, mid-turbinate nasal swab, nasopharyngeal swab, oropharyngeal swab, tonsillar swab, buccal swab, lingual swab, gingival crevicular fluid, saliva). The rise and fall of viral loads in each specimen type throughout infection affects whether SARS-CoV-2 is detectable in that specimen type at the time of testing. A diagnostic test successfully detects infection when the viral load in the tested specimen type is above the limit of detection (LOD) of the test.

In our recent analysis<sup>43</sup> of viral loads from three specimen types (anterior-nares swab, oropharyngeal swab, and saliva) prospectively collected daily before or at the incidence of infection with the Omicron variant, we observed that longitudinal

viral-load timecourses in different specimen types from the same person often exhibit extreme differences and do not correlate. Further, most people in that study<sup>43</sup> and our prior study of ancestral variants<sup>44</sup> had delayed accumulation of virus in nasal swabs compared with oral specimens. A delayed rise in nasal-swab viral loads has been observed in many studies,<sup>45-48</sup> including among participants in a SARS-CoV-2 human challenge study who received intra-nasal inoculation.<sup>49</sup> We<sup>50</sup> and others<sup>43,46,48,51,52</sup> found that this delayed rise in nasal viral loads, in combination with the high levels of virus required for detection by tests with low analytical sensitivity, leads to delayed detection of infected and infectious individuals by nasal-swab rapid antigen tests. Non-nasal upper respiratory specimen types and/or tests with high-analytical-sensitivity could detect these individuals earlier in the infection.<sup>43</sup>

In this study, we aimed to investigate whether test analytical sensitivity and differences in viral-load patterns among different specimen types may have implications for household transmission. We specifically tested whether the type of test (rapid nasal-swab vs all other COVID-19 tests) used to first identify household index cases was correlated with higher rates of transmission to household contacts. Data were collected from a 2-year COVID-19 household transmission study in Southern California. We applied a two-level random intercept model, clustering by household and controlling for potential confounders<sup>53</sup> to assess the relationship between the use of a nasal-swab rapid COVID-19 tests to first identify the household index case, and subsequent transmission to household contacts (**Fig 1**).

## **Methods**

### *Participant Enrollment and Metadata*

We conducted a case-ascertained COVID-19 household transmission observational cohort study in Southern California in two phases: between September 2020 and June 2021,<sup>44,54</sup> prior to the predominance of the Delta variant<sup>55</sup>, and between November 2021 and March 2022,<sup>43</sup> during the emergence and subsequent predominance of the Omicron variant<sup>55</sup> (**Table S1A**). The study was approved by the California Institute of Technology IRB (protocol #20-1026). Participants aged 8 years and older provided written informed consent, and all minors additionally provided verbal assent accompanied by written parental permission.

Upon enrollment, participants completed a questionnaire to provide information about demographics (see Supplementary Information). At the conclusion of their participation, participants were asked to complete another questionnaire to report any SARS-CoV-2 test results from outside of the study, updated infection status of each household member (including those unenrolled), and infection-control practices performed.

### *Laboratory Screening Testing*

Specimens (saliva, anterior nares swabs, oropharyngeal swabs, **Fig 1A,B**) from participants underwent laboratory testing for SARS-CoV-2 infection, as previously described (Supplementary Information).<sup>43,44,54</sup> Participants reported COVID-19-like symptoms at each specimen collection timepoint. At least one specimen from most households underwent viral sequencing as previously described,<sup>43,44</sup> to ascertain the infecting SARS-CoV-2 variant of household members. For one household enrolled in early December 2022, sequencing was not performed but Delta variant was inferred based on the dominating variants circulating at the time<sup>55</sup> and for 5 households enrolled after mid-January 2022, sequencing was not performed, but Omicron variant was inferred based on local predominance.<sup>55</sup>

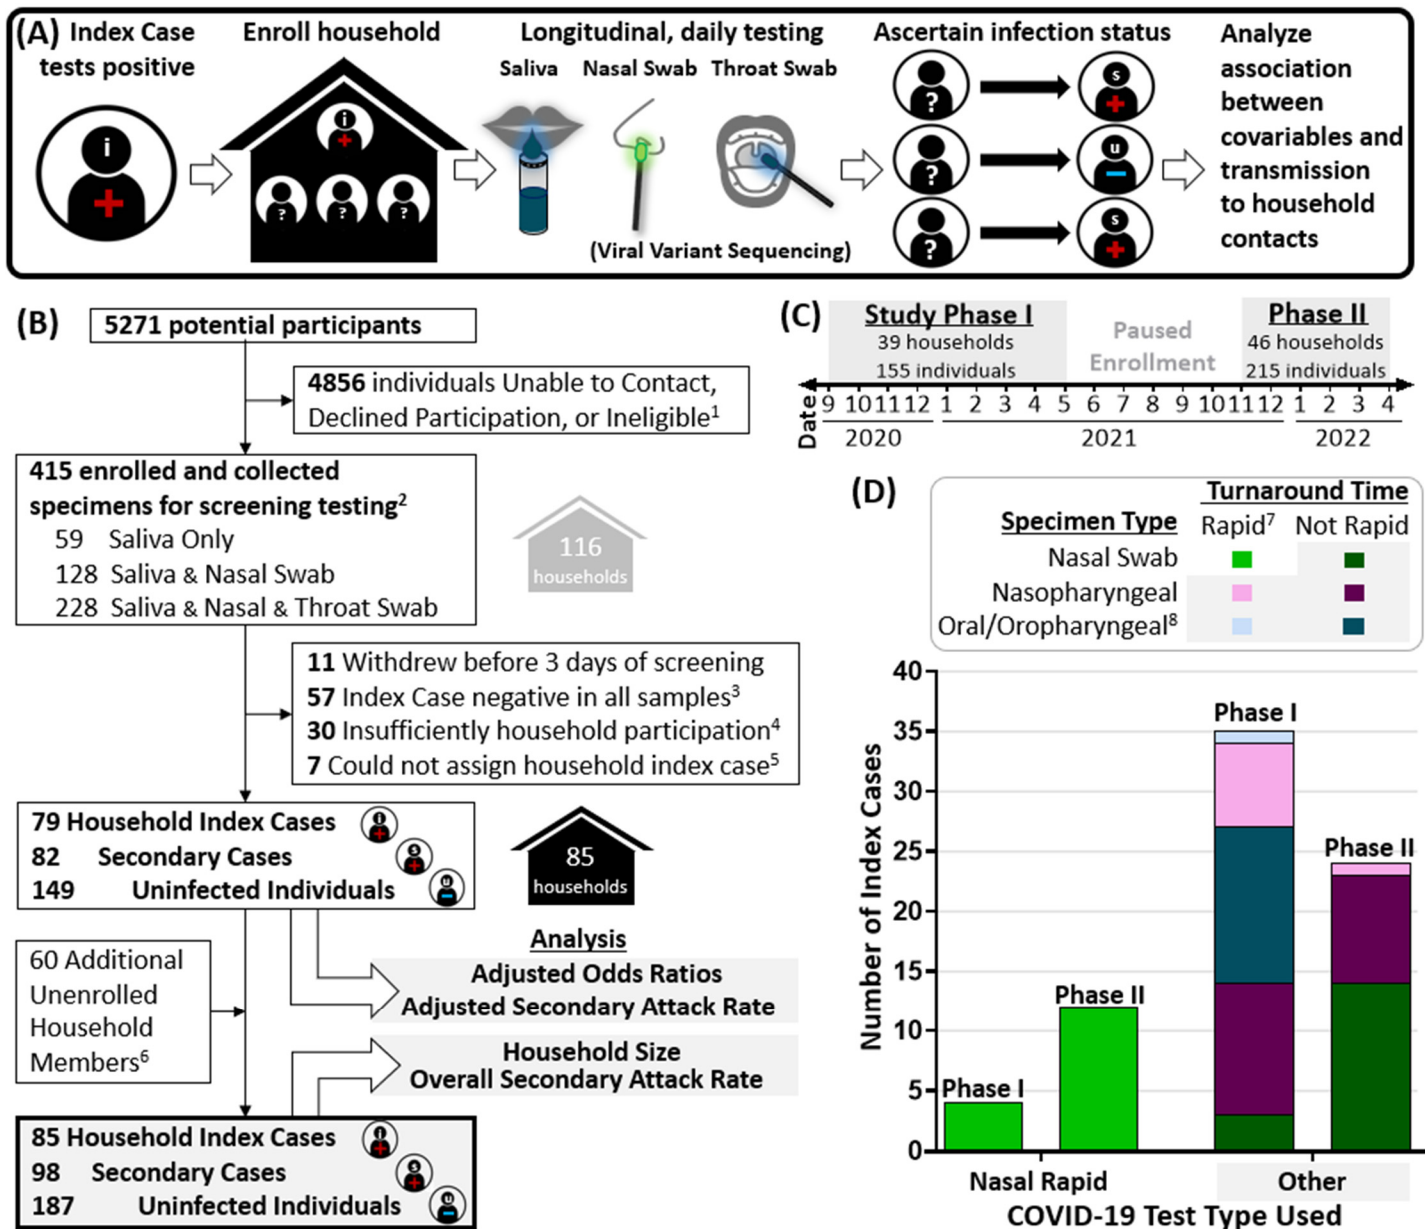

**FIGURE 1 Overview of study design and analysis.** (A) Study design beginning with recording the COVID-19 test type first used to identify index cases at study enrollment, enrollment of household contacts for daily, high-analytical-sensitivity laboratory screening, and analysis of potential factors modulating transmission. (B) CONSORT diagram for study enrollment. (C) Timeline of participant enrollment in study Phase I (September 2020—June 2021) and Phase II (November 2021—March 2022). Date is listed as numeric month over year. (D) Breakdown of self-reported COVID-19 test types (specimen type, and rapid or not) utilized to first identify household index cases. Test type was not reported by 10 of 85 index cases.

1. Individuals were ineligible for enrollment if they resided outside study jurisdiction, lived alone, or were more than 7 days from positive result or symptom onset. 2. Participants in Phase I collected either saliva only, or paired saliva and nasal swabs; participants in Phase II collected paired saliva, nasal swabs, and throat swabs. 3. Households were considered not at risk if no member including the suspected index case had detectable SARS-CoV-2 in any sample tested upon enrollment. 4. Households in which a majority of unenrolled household members were considered to have insufficient information. 5. Households in which a single household index case could not be assigned. 6. Information about unenrolled household members was reported by enrolled participants. 7. Test type was defined as ‘Rapid’ if the participant reported receiving results either within an hour or on the same day as the specimen was collected. Longer turnaround times were classified as ‘Not Rapid’ tests. 8. Oral/oropharyngeal specimen type category included participants who self-reported that saliva, buccal swabs, or oropharyngeal swabs were collected for testing.

### *Statistical Analyses*

We utilized the questionnaire data and laboratory testing data to investigate SARS-CoV-2 transmission within households. Households were included in this analysis if laboratory testing confirmed at least one household member was acutely infected with SARS-CoV-2 and more than a third of reported household members were enrolled in the study. Three households were excluded because they withdrew before three days of screening, 22 households were excluded because all members were negative for SARS-CoV-2 in all tested specimens, five households were excluded because of insufficient information about unenrolled household contacts, and one household was excluded because of inability to determine index case (**Fig 1B**). See Supplemental Information for details.

For each household, an index case was defined as the first member of the household (enrolled in the study or not) to test positive for SARS-CoV-2 infection, usually prior to enrollment. In one case where multiple members had the same first test date, the member with earlier self-reported onset of symptoms was considered the household index case. In five cases where symptom onset of household members was within 1 day of each other, we defined the index case as the individual with a known exposure to a non-household contact with laboratory-confirmed SARS-CoV-2 infection. In three cases with similar timing of exposure to infected, non-household contacts, the index case was defined as the individual whose viral load peaked first. All other members of the household who tested positive for SARS-CoV-2 prior to or during household enrollment in the study were considered secondary cases. Household members who never tested positive for SARS-CoV-2 prior to or while the household was enrolled in the study were considered uninfected. 143 of 149 (96%) participants classified as uninfected were enrolled and screened for at least 5 days; most (53%) were enrolled for at least 9 days.

The test type of the household index case was interpreted as a “nasal-swab rapid test” when the household index case self-reported “shallow nasal swab (anterior nares or mid turbinate nasal swab)” as the specimen type and a result turnaround time of “within an hour” or “same day.” Participants were not asked to report the specific test name, laboratory platform, or viral target (e.g., molecular, antigen), due to concerns that laypersons would not be aware of these terms (especially if the test was run by a clinic rather than direct-to-consumer). However, rapid tests (both antigen and molecular) have characteristically low analytical sensitivity because they forego the time-consuming and technically challenging extraction steps to purify and concentrate viral targets. Because our hypothesis was related to low-analytical-sensitivity rapid tests performed on specimens from nasal swabs, we simply distinguish rapid tests from those with longer turnaround times and presumably higher analytical sensitivity (**Fig 1D**).

We calculated unadjusted odds ratios (ORs) for *a priori* confounders,<sup>56</sup> infection-control practices, the use of nasal-swab rapid tests by index cases, and the risk of SARS-CoV-2 transmission to household contacts using mixed-effect logistic regression (**Fig 2, Table S2**). We also used a two-level mixed-effects logistic regression model with random intercepts by household to account for clustering of individuals within households and including all covariables to estimate adjusted odds ratios (aOR) (**Fig 2, Table S3**). This type of model<sup>57</sup> was chosen to estimate the effects of predictors at both individual and household levels. The model adjusted for a sufficient set of the following potentially confounding variables: household size,<sup>10-12</sup> age,<sup>6,15,16</sup> race/ethnicity,<sup>11,13</sup> and vaccination status.<sup>18-22</sup> We also accounted for infecting SARS-CoV-2 viral variant.<sup>18-20,28,32,33</sup> Observations with missing data were omitted from respective analyses.

We used this model to assess the effect of household prevention practices and the COVID-19 test type used to first identify the household index case. An aOR >1.0 was associated with increased likelihood of household transmission, and deemed statistically significant if its associated *P*-value was  $\leq 0.05$  by Wald and likelihood ratio tests.

Predictive margins based on the results of the regression models were used to estimate unadjusted and adjusted secondary attack rates (SAR and aSAR). Binomial confidence intervals (CIs) were calculated as recommended by the Clinical Laboratory Standards Institute EP12-A guidance.<sup>58</sup> Differences among SARs and aSARs were assessed across strata.<sup>59</sup>

We separately assessed the conditional direct effects of viral variant and test type used to identify the household index case by modifying the model with or without each of these covariables (**Fig 3**). Calculations were performed in STATA/BE 17.0.

**Table 1. Demographics, COVID-19 Vaccination Status, Viral Variant, and Smoking History of the 85-Household Cohort Used for Analyses.**

|                                       | Index Case |            | Secondary Case |            | Uninfected |            | Total    |            |
|---------------------------------------|------------|------------|----------------|------------|------------|------------|----------|------------|
|                                       | N= 85      |            | N= 98          |            | N= 187     |            | N= 370   |            |
| <b>Self-Reported Gender Identity*</b> | <b>n</b>   | <b>(%)</b> | <b>n</b>       | <b>(%)</b> | <b>n</b>   | <b>(%)</b> | <b>n</b> | <b>(%)</b> |
| Male                                  | 31         | 36.5       | 50             | 51.0       | 91         | 48.7       | 172      | 46.5       |
| Female                                | 52         | 61.2       | 45             | 45.9       | 96         | 51.3       | 193      | 52.2       |
| Non-Binary/Other                      | 0          | 0.0        | 0              | 0.0        | 0          | 0.0        | 0        | 0.0        |
| Unknown                               | 2          | 2.4        | 3              | 3.1        | 0          | 0.0        | 5        | 1.4        |
| <b>Age Category (years)</b>           | <b>n</b>   | <b>(%)</b> | <b>n</b>       | <b>(%)</b> | <b>n</b>   | <b>(%)</b> | <b>n</b> | <b>(%)</b> |
| <10                                   | 4          | 4.7        | 19             | 19.4       | 33         | 17.6       | 56       | 15.1       |
| 10 to 60                              | 78         | 91.8       | 75             | 76.5       | 133        | 71.1       | 286      | 77.3       |
| >60                                   | 2          | 2.4        | 2              | 2.0        | 21         | 11.2       | 25       | 6.8        |
| Unknown                               | 1          | 1.2        | 2              | 2.0        | 0          | 0.0        | 3        | 0.8        |
| <b>Self-Reported Race/Ethnicity**</b> | <b>n</b>   | <b>(%)</b> | <b>n</b>       | <b>(%)</b> | <b>n</b>   | <b>(%)</b> | <b>n</b> | <b>(%)</b> |
| Asian or Pacific Islander             | 14         | 16.5       | 10             | 10.2       | 23         | 12.3       | 47       | 12.7       |
| Biracial                              | 4          | 4.7        | 4              | 4.1        | 8          | 4.3        | 16       | 4.3        |
| Black/African American                | 2          | 2.4        | 3              | 3.1        | 11         | 5.9        | 16       | 4.3        |
| Native American/Alaska Native         | 4          | 4.7        | 1              | 1.0        | 7          | 3.7        | 12       | 3.2        |
| Unknown                               | 20         | 23.5       | 39             | 39.8       | 68         | 36.4       | 127      | 34.3       |
| White, Hispanic                       | 22         | 25.9       | 20             | 20.4       | 26         | 13.9       | 68       | 18.4       |
| White, Non-Hispanic                   | 19         | 22.4       | 21             | 21.4       | 44         | 23.5       | 84       | 22.7       |
| <b>Vaccination Status***</b>          | <b>n</b>   | <b>(%)</b> | <b>n</b>       | <b>(%)</b> | <b>n</b>   | <b>(%)</b> | <b>n</b> | <b>(%)</b> |
| Unvaccinated                          | 43         | 50.6       | 40             | 40.8       | 65         | 34.8       | 148      | 40.0       |
| Partial                               | 0          | 0.0        | 2              | 2.0        | 3          | 1.6        | 5        | 1.4        |
| Complete                              | 19         | 22.4       | 23             | 23.5       | 36         | 19.3       | 78       | 20.6       |
| Boosted                               | 17         | 20.0       | 17             | 17.3       | 45         | 24.1       | 79       | 21.4       |
| Unknown                               | 6          | 7.1        | 16             | 16.3       | 38         | 20.3       | 60       | 16.2       |
| <b>Household Viral Variant</b>        | <b>n</b>   | <b>(%)</b> | <b>n</b>       | <b>(%)</b> | <b>n</b>   | <b>(%)</b> | <b>n</b> | <b>(%)</b> |
| Ancestral                             | 39         | 45.9       | 37             | 37.8       | 79         | 42.2       | 155      | 41.9       |
| Delta                                 | 12         | 14.1       | 14             | 14.3       | 22         | 11.8       | 48       | 13.0       |
| Omicron                               | 28         | 32.9       | 45             | 45.9       | 64         | 34.2       | 137      | 37.0       |
| Unknown                               | 6          | 7.1        | 2              | 2.0        | 22         | 11.8       | 30       | 8.1        |
| <b>Smoking/Vaping History History</b> | <b>n</b>   | <b>(%)</b> | <b>n</b>       | <b>(%)</b> | <b>n</b>   | <b>(%)</b> | <b>n</b> | <b>(%)</b> |
| Never                                 | 60         | 70.6       | 58             | 59.2       | 105        | 56.1       | 223      | 60.3       |
| Former                                | 13         | 15.3       | 14             | 14.3       | 24         | 12.8       | 51       | 13.8       |
| Current                               | 5          | 5.9        | 4              | 4.1        | 6          | 3.2        | 15       | 4.1        |
| Unknown                               | 7          | 8.2        | 22             | 22.4       | 52         | 27.8       | 81       | 21.9       |

\*Both sex assigned at birth and current gender identity were self-reported by participants. One participant reported male assignment at birth and current gender identity of woman. Reported gender is listed.

\*\*63 individuals currently listed as 'Unknown' did not select a race category but wrote-in "Latino"/"Latina"/"Latinx."

\*\*\*Participants reported date and manufacturer of each vaccine dose received; vaccination status was defined only by doses received at least 7 days prior to enrollment in the study. Unvaccinated was defined as having received no COVID-19 vaccine doses. Partial vaccination was defined as receiving one dose of a multiple-dose series (e.g., Pfizer-BioNTech, Moderna). Complete vaccination was defined as receiving all doses of an initial COVID-19 vaccine series. Boosted was defined as the participant receiving any dose beyond an initial COVID-19 vaccine series. Vaccination and viral variant distributions varied by Study Phase; demographics by Study Phase are shown in **Table S1**.



## Results

We analyzed data from 370 individuals (enrolled and unenrolled participants) of which 85 were defined as household index cases (**Table 1**). Among index cases, nasal-swab rapid test use more than tripled from the first to second study phase (**Fig 1D**). Only 3 of 16 index cases first identified by a rapid nasal-swab rapid tests had a prior negative rapid nasal-test within three days of their positive result, suggesting repeat rapid nasal testing.<sup>60</sup> Across both study phases, we observed an overall, unadjusted SAR of 34.4% (95% CI 28.9%–40.2%, 98 of 285 household contacts) in this population.

Without accounting for index case testing, we observed several covariables associated with SARS-CoV-2 transmission in households (**Fig 2**). Household size greater than four members was associated with nearly a 5-fold increase in the odds of infection (aOR=4.78, 95% CI 1.80–12.70). Whether a household contact had received at least one dose of a COVID-19 vaccine was found to reduce the odds of infection by 70% (aOR=0.30, 95% CI 0.08–1.17). Most infection-control practices were associated with reduced risk, such as not sharing a bedroom with (aOR=0.25, 95% CI 0.10–0.62) and wearing masks around (aOR=0.33, 95% CI 0.12–0.88) infected individuals.

Our results were also consistent with previous observations that infection with the Omicron variant is associated with greater transmission than ancestral variants.<sup>8,18,19,31-33</sup> Increased transmissibility of the Omicron variant compared to ancestral variants was observed in our study by both aOR (3.64, 95% CI 0.88–15.07), as well as aSAR stratified by whether the index case was infected with the Omicron variant (46.9%, 95% CI 32.3%–61.6%) or an ancestral variant (27.3%, 95% CI 17.7%–36.9%). Increased transmissibility of the Omicron variant was not observed in the univariable model (**Table S2**), likely because this model does not correct for a compensating, protective effect of vaccination, which was more prevalent among individuals from households infected with the Omicron variant (76.7%) than ancestral variants (17.5%, **Table S1**).

Identification of index cases by nasal-swab rapid tests was associated with higher transmission to household contacts than other test types, both when aggregated (**Fig 2C**) and for all other test type subgroups (**Table S3**), and in both univariable (OR=2.64, 95% CI 1.41–4.95,  $P=0.003$ , **Table S2**) and multivariable models (aOR=4.93, 95% CI 1.65–14.69,  $P=0.004$ , **Fig 2**). The multivariable model suggests that nasal-swab rapid test use by index cases increased the odds of transmission relative to other test types by almost five-fold (though both smaller and larger increases are also compatible with the data). Index cases who used nasal-swab rapid tests also had a higher aSAR of 53.5% (95% CI 38.7%–68.3%) compared to other test types (27.0%, 95% CI 19.3%–34.8%).

Because the use of nasal-swab rapid test use has increased in parallel with SARS-CoV-2 variants shown to have increased transmissibility, we examined the relationship of these two covariables on risk of transmission to household contacts. The use of a nasal-swab rapid test to identify the index case was associated with a similar increased risk of transmission to household contacts) as infection with the Omicron variant (**Fig 3**). Introducing adjustment in the model for nasal-swab rapid test use by the index case decreased the aOR for infection with the Omicron variant from 3.63 (95% CI 0.88-15.0) to 2.40 (95% CI 0.63–9.22) (**Fig 3A**). The aOR of rapid nasal-swab test use also decreased from 5.50 (95% CI 1.78–17.04) to 4.90 (95% CI 1.65–14.59) without or with adjustment for viral variant, but nasal-swab rapid tests remained associated with at least a 1.5-fold increase in the odds of household contact infection (**Fig 3B**).

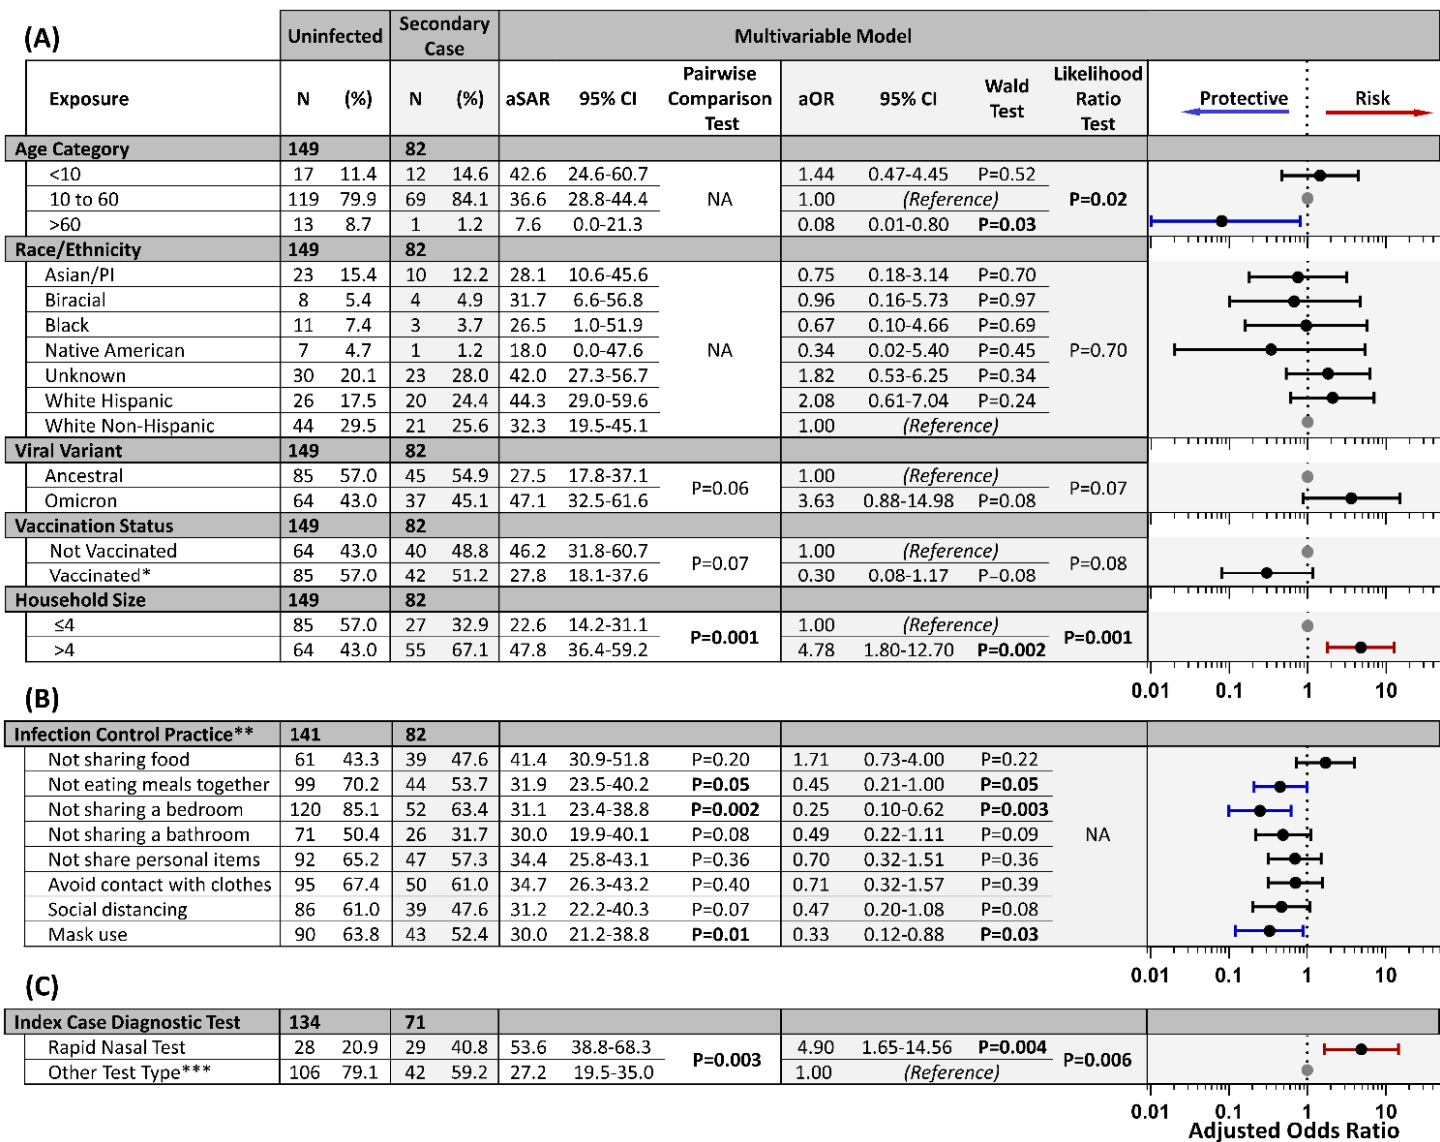

**FIGURE 2 Results of Modeled Risk of Transmission to Household Contacts.** Counts (N) of enrolled individuals who did not become infected during enrollment (uninfected) or became infected after the index case (secondary case) are provided for each covariable included in the multivariable model (**Fig 1C**). The adjusted secondary attack rate (aSAR) and adjusted odds ratio (aOR) point estimates with 95% confidence intervals from multivariable analysis are listed for each covariable and visualized to the right. Results of univariable analysis are provided in **Table S2**. The Wald test *P*-values for the analyses likelihood ratio test is shown. Covariates with an aOR 95% CI >1 are shown in red, and those <1 are shown in blue. Reference groups are shown as a grey point. **(A)** Data for the five covariables included in the sufficient set. **(B)** Covariables related to infection-control practices controlling for the sufficient set. The aOR represents the conditional effect of the covariable in the model. **(C)** Association between COVID-19 test type used to identify the household index case, and subsequent transmission to household contacts. Unenrolled household index cases' test type was unknown, resulting in a lower total count for this category.

\*Vaccinated is defined as having received at least one dose of a COVID-19 vaccine at least 7 days prior to enrollment.

\*\*Participants were asked to respond whether or not they performed each action during interactions data coded. Data on infection control practices was not available for some participants. Observations with missing data were omitted, resulting in a lower total count for this category of covariables.

\*\*\*Analysis by Other Test Type subgroups is shown in **Table S3**.

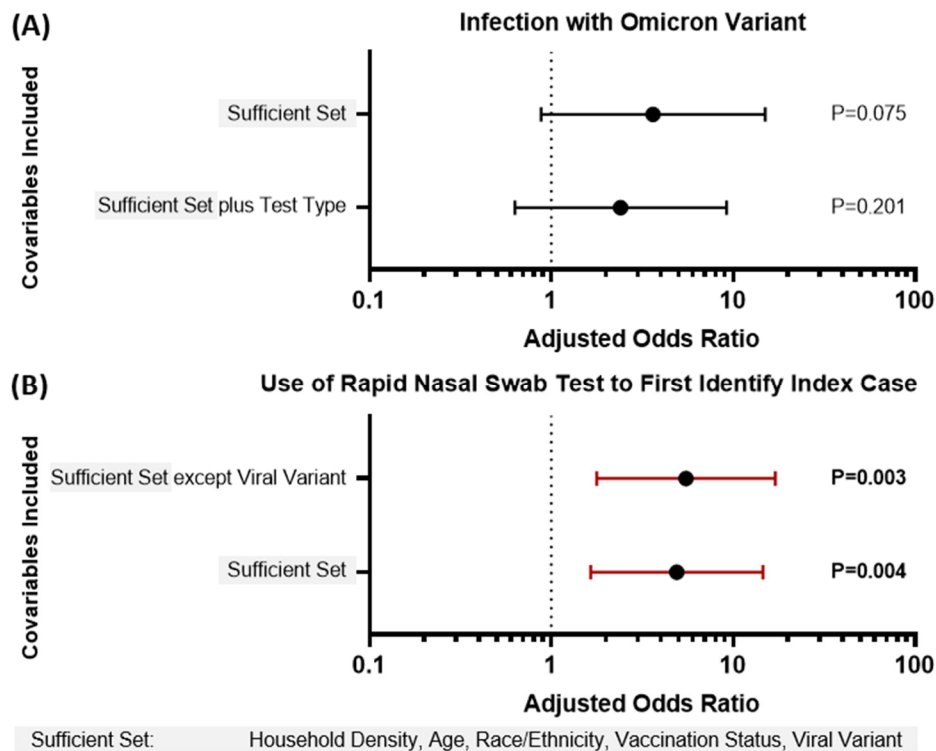

**FIGURE 3. Effect Size Interactions of COVID-19 Test Type and Viral Variant on Transmission to Household Contacts.** (A) The adjusted odds ratios (aOR) for infection with the Omicron variant (with ancestral SARS-CoV-2 variants as reference). Analysis was performed while controlling for the sufficient set of covariables in the model (grey box), as well as when additionally controlling for whether the index case was first identified using a nasal-swab rapid test or other COVID-19 test type. (B) The aOR for the use of nasal-swab rapid tests to first identify index cases, as opposed to other COVID-19 test type. Analysis was performed while controlling for the sufficient set of covariables in the model (shown in grey box), and with all covariables in the sufficient set except for viral variant. Wald test *P*-values are shown for each estimate of effect size. All error bars are 95% CI. Vertical dotted black line indicates an aOR of 1.0.

## Discussion

Household contacts of index cases who used nasal-swab rapid antigen COVID-19 tests for primary infection detection had an increased risk of becoming infected compared with household contacts of index cases who used other test types. Greater transmission of SARS-CoV-2 to household contacts by individuals first identified by nasal-swab rapid tests is supported mechanistically by studies of SARS-CoV-2 viral load and nasal swab rapid test performance. First, a gradual rise in viral loads, as we<sup>43,44,50,61</sup> and others<sup>52,62-64</sup> have observed, often creates a several-day delay between when an individual likely becomes infectious and when viral loads reach levels detectable by low-analytical-sensitivity, rapid tests. Second, a delay in the rise of nasal viral loads relative to oral specimen types, as we<sup>43,44,50</sup> and others<sup>45,49</sup> have observed, renders nasal-swab rapid tests less able to detect individuals during the early phase of the infection.<sup>46,50</sup> During this early period of low nasal viral loads, we<sup>43,50</sup> and others<sup>46</sup> find that individuals exhibited high, presumably infectious viral loads in oral specimens. Relatedly, among data from a SARS-CoV-2 human challenge study,<sup>49</sup> we see that the majority of infected participants had

replication-competent virus present in throat swabs at least one day prior to nasal-swabs. Therefore, nasal-swab rapid tests may only yield positive results after exposure and transmission to contacts has occurred. These results together suggest that nasal-swab rapid tests are not as effective at identifying index cases to limit subsequent transmission as other test types.

Several additional findings from our model and dataset were consistent with prior studies. Household size was a significant risk factor for household transmission,<sup>9-12</sup> whereas vaccination<sup>8,18-22</sup> and infection-control practices<sup>14,18,23-25</sup> were protective. The overall SAR (34.4%) we observed was similar to what others have reported.<sup>5,12,18,31,65,66</sup> Relatedly, in one of those studies<sup>5</sup>, household transmission was monitored by daily high-analytical-sensitivity screening testing and the SAR calculated using only nasal-swab test data was lower than when both saliva and nasal-swab test data were used, which supports that even high-analytical-sensitivity nasal-swab testing may miss some infected individuals, and that the specimen type used for evaluation can impact estimates of transmission.

We also observed, as other epidemiological studies have,<sup>8,18,19,31-33</sup> that infection with the Omicron variant was associated with increased transmission compared with ancestral viral variants. However, the use of rapid nasal-swab tests (as opposed to other test types) to detect index cases had a similar conditional direct effect on transmission to household contacts as infection with the Omicron variant. Because the effect size of the Omicron variant association with transmission to household contacts decreased when controlling for nasal-swab rapid test use in our study, we speculate that a portion of the increased transmissibility attributed to the Omicron variant in published epidemiological studies may be partially attributable to the increased use of rapid nasal-swab tests in the U.S. that coincided with the predominance of this variant.<sup>10,67</sup> Although our results do not invalidate studies that conclude an increased transmissibility of the Omicron variant, they emphasize the potential impact of COVID-19 test type on estimates of transmissibility from epidemiological data.

## **Limitations**

Our findings are subject to limitations. First, vaccination status, demographic information, and infection-control practices are self-reported and may be subject to recall bias. Second, although questionnaires were written in simple terms (e.g. “shallow nasal swab” and “deep nasal swab”), participants could have misinterpreted test type. Third, age, gender, and infection status of each unenrolled household member was independently reported by each enrolled household member, which could lead to inaccurate reporting. Fourth, our potential misclassification of which household member was the index case may impact the analysis,<sup>53</sup> although in almost all (79 of 85) households, the index case was confirmed by timing of self-reported positive tests. Fifth, in our transmission model, we did not analyze ordinal levels of contact among household

members (all household members were assumed to have equal contact). Instead, mitigating factors, including infection-control practices, were assessed for protective effects against transmission. Sixth, it is possible that high-analytical-sensitivity tests could have turnaround times which we classify as rapid. However, such misclassification would bias toward the null. Finally, evidence suggests<sup>52,68</sup> and the CDC<sup>60</sup> recommends repeating rapid antigen tests over several days to improve clinical sensitivity. Although some index cases reported a negative test result in the days prior to their first positive result, most participants in our study did not use repeated rapid testing.

## **Conclusion**

Rapid COVID-19 tests, such as antigen tests, are less expensive, portable, and offer faster results than high-analytical-sensitivity molecular tests. However, results from this observational study suggest that the use of nasal-swab rapid COVID-19 tests to first identify infection do not limit household transmission as well as other test types. The use of tests with low analytical sensitivity by an infected individual can have two effects on transmission: (i) a true-positive result can change behavior to increase infection-control practices in a timely manner, thus reducing transmission, or (ii) a false-negative result can result in a health certificate effect,<sup>69</sup> where individuals falsely assume they are not infected/infectious and reduce precautions, thereby increasing transmission. While imperfect testing may be better than no testing, understanding the optimal use and limitations of rapid tests is important not only for SARS-CoV-2, but other pathogens for which timely infection control and/or early treatment is critical.

## **DATA SHARING STATEMENT**

Raw data is available at CaltechDATA: [#https://doi.org/10.22002/csh5w-rf132.#](https://doi.org/10.22002/csh5w-rf132)

## **ACKNOWLEDGEMENTS**

We thank the University of California, Los Angeles, Office of Advanced Research Computing, Statistical Methods and Data Analytics Group for recommendations on statistical methodology and implementation, and Dr. Andy Lin for guidance designing the analysis and feedback on the manuscript. This study is based on research funded in part by the Bill & Melinda Gates Foundation (INV-023124). The findings and conclusions contained within are those of the authors and do not necessarily reflect positions or policies of the Bill & Melinda Gates Foundation. This study was also funded in part by grants from the Ronald and Maxine Linde Center for New Initiatives at the California Institute of Technology (to RFI), a grant from the Jacobs Institute for Molecular Engineering for Medicine at the California Institute of Technology (to RFI), a DGSOM Geffen Fellowship at the University of California, Los Angeles (to AVW), and the John Stauffer Charitable Trust SURF Fellowship at the California Institute of Technology (to JJ).

## **DISCLOSURE**

R.F.I. is a cofounder, consultant, and a director and has stock ownership of Talis Biomedical Corp. All other co-authors report no competing interests.

## REFERENCES

1. Del Brutto OH, Costa AF, Mera RM, Recalde BY, Bustos JA, Garcia HH. Household Clustering of SARS-CoV-2 in Community Settings: A Study from Rural Ecuador. *Am J Trop Med Hyg.* 2020;103(3):1207-1210.
2. Lee EC, Wada NI, Grabowski MK, Gurley ES, Lessler J. The engines of SARS-CoV-2 spread. *Science.* 2020;370(6515):406-407.
3. Li F, Li YY, Liu MJ, et al. Household transmission of SARS-CoV-2 and risk factors for susceptibility and infectivity in Wuhan: a retrospective observational study. *Lancet Infect Dis.* 2021;21(5):617-628.
4. Donnelly MAP, Chuey MR, Soto R, et al. Household Transmission of Severe Acute Respiratory Syndrome Coronavirus 2 (SARS-CoV-2) Alpha Variant-United States, 2021. *Clin Infect Dis.* 2022;75(1):e122-e132.
5. Grijalva CG, Rolfes MA, Zhu Y, et al. Transmission of SARS-COV-2 Infections in Households - Tennessee and Wisconsin, April-September 2020. *MMWR Morb Mortal Wkly Rep.* 2020;69(44):1631-1634.
6. McLean HQ, Grijalva CG, Hanson KE, et al. Household Transmission and Clinical Features of SARS-CoV-2 Infections by Age in 2 US Communities. *medRxiv.* 2021.
7. Madewell ZJ, Yang Y, Longini IM, Jr., Halloran ME, Dean NE. Household Transmission of SARS-CoV-2: A Systematic Review and Meta-analysis. *JAMA Netw Open.* 2020;3(12):e2031756.
8. Madewell ZJ, Yang Y, Longini IM, Jr., Halloran ME, Dean NE. Factors Associated With Household Transmission of SARS-CoV-2: An Updated Systematic Review and Meta-analysis. *JAMA Netw Open.* 2021;4(8):e2122240.
9. Nash D, Qasmieh S, Robertson M, et al. Household factors and the risk of severe COVID-like illness early in the U.S. pandemic. *PLoS One.* 2022;17(7):e0271786.
10. Rader B, Scarpino SV, Nande A, et al. Crowding and the shape of COVID-19 epidemics. *Nat Med.* 2020;26(12):1829-1834.
11. Cerami C, Popkin-Hall ZR, Rapp T, et al. Household Transmission of Severe Acute Respiratory Syndrome Coronavirus 2 in the United States: Living Density, Viral Load, and Disproportionate Impact on Communities of Color. *Clin Infect Dis.* 2022;74(10):1776-1785.
12. Laajaj R, Webb D, Aristizabal D, et al. Understanding how socioeconomic inequalities drive inequalities in COVID-19 infections. *Sci Rep.* 2022;12(1):8269.
13. Niedzwiedz CL, O'Donnell CA, Jani BD, et al. Ethnic and socioeconomic differences in SARS-CoV-2 infection: prospective cohort study using UK Biobank. *BMC Med.* 2020;18(1):160.
14. Chu VT, Yousaf AR, Chang K, et al. Household Transmission of SARS-CoV-2 from Children and Adolescents. *N Engl J Med.* 2021;385(10):954-956.
15. Bi Q, Lessler J, Eckerle I, et al. Insights into household transmission of SARS-CoV-2 from a population-based serological survey. *Nat Commun.* 2021;12(1):3643.
16. Chen F, Tian Y, Zhang L, Shi Y. The role of children in household transmission of COVID-19: a systematic review and meta-analysis. *Int J Infect Dis.* 2022;122:266-275.
17. CDC. COVID-19 after Vaccination: Possible Breakthrough Infection. 2022; <https://www.cdc.gov/coronavirus/2019-ncov/vaccines/effectiveness/why-measure-effectiveness/breakthrough-cases.html>.



18. Baker JM, Nakayama JY, O'Hegarty M, et al. SARS-CoV-2 B.1.1.529 (Omicron) Variant Transmission Within Households - Four U.S. Jurisdictions, November 2021-February 2022. *MMWR Morb Mortal Wkly Rep.* 2022;71(9):341-346.
19. Lyngse FP, Mortensen LH, Denwood MJ, et al. Household transmission of the SARS-CoV-2 Omicron variant in Denmark. *Nat Commun.* 2022;13(1):5573.
20. Rosenberg ES, Dorabawila V, Easton D, et al. Covid-19 Vaccine Effectiveness in New York State. *N Engl J Med.* 2022;386(2):116-127.
21. Suthar AB, Wang J, Seffren V, Wiegand RE, Griffing S, Zell E. Public health impact of covid-19 vaccines in the US: observational study. *BMJ.* 2022;377:e069317.
22. Tande AJ, Pollock BD, Shah ND, et al. Impact of the Coronavirus Disease 2019 (COVID-19) Vaccine on Asymptomatic Infection Among Patients Undergoing Preprocedural COVID-19 Molecular Screening. *Clin Infect Dis.* 2022;74(1):59-65.
23. Brooks JT, Butler JC. Effectiveness of Mask Wearing to Control Community Spread of SARS-CoV-2. *JAMA.* 2021;325(10):998-999.
24. Chu DK, Akl EA, Duda S, et al. Physical distancing, face masks, and eye protection to prevent person-to-person transmission of SARS-CoV-2 and COVID-19: a systematic review and meta-analysis. *Lancet.* 2020;395(10242):1973-1987.
25. Ha BTT, Ngoc Quang L, Quoc Thanh P, Duc DM, Mirzoev T, Bui TMA. Community engagement in the prevention and control of COVID-19: Insights from Vietnam. *PLoS One.* 2021;16(9):e0254432.
26. LA County Public Health. Los Angeles County Public Health COVID-19 Vaccine Dashboard. 2022; <http://publichealth.lacounty.gov/media/coronavirus/vaccine/vaccine-dashboard.htm>.
27. Julin CH, Robertson AH, Hungnes O, et al. Household Transmission of SARS-CoV-2: A Prospective Longitudinal Study Showing Higher Viral Load and Increased Transmissibility of the Alpha Variant Compared to Previous Strains. *Microorganisms.* 2021;9(11).
28. Campbell F, Archer B, Laurenson-Schafer H, et al. Increased transmissibility and global spread of SARS-CoV-2 variants of concern as at June 2021. *Euro Surveill.* 2021;26(24).
29. Allen H, Vusirikala A, Flannagan J, et al. Household transmission of COVID-19 cases associated with SARS-CoV-2 delta variant (B.1.617.2): national case-control study. *Lancet Reg Health Eur.* 2022;12:100252.
30. Jorgensen SB, Nygard K, Kacelnik O, Telle K. Secondary Attack Rates for Omicron and Delta Variants of SARS-CoV-2 in Norwegian Households. *JAMA.* 2022;327(16):1610-1611.
31. Ogata T, Tanaka H, Tanaka E, et al. Increased Secondary Attack Rates among the Household Contacts of Patients with the Omicron Variant of the Coronavirus Disease 2019 in Japan. *Int J Environ Res Public Health.* 2022;19(13).
32. Song JS, Lee J, Kim M, et al. Serial Intervals and Household Transmission of SARS-CoV-2 Omicron Variant, South Korea, 2021. *Emerg Infect Dis.* 2022;28(3):756-759.
33. Jalali N, Brustad HK, Frigessi A, et al. Increased household transmission and immune escape of the SARS-CoV-2 Omicron compared to Delta variants. *Nat Commun.* 2022;13(1):5706.
34. He X, Lau EHY, Wu P, et al. Temporal dynamics in viral shedding and transmissibility of COVID-19. *Nat Med.* 2020;26(5):672-675.

35. Cheng HY, Jian SW, Liu DP, et al. Contact Tracing Assessment of COVID-19 Transmission Dynamics in Taiwan and Risk at Different Exposure Periods Before and After Symptom Onset. *JAMA Intern Med.* 2020;180(9):1156-1163.
36. Tindale LC, Stockdale JE, Coombe M, et al. Evidence for transmission of COVID-19 prior to symptom onset. *Elife.* 2020;9:e57149.
37. Buitrago-Garcia D, Egli-Gany D, Counotte MJ, et al. Occurrence and transmission potential of asymptomatic and presymptomatic SARS-CoV-2 infections: A living systematic review and meta-analysis. *PLoS Med.* 2020;17(9):e1003346.
38. Dora AV, Winnett A, Jatt LP, et al. Universal and Serial Laboratory Testing for SARS-CoV-2 at a Long-Term Care Skilled Nursing Facility for Veterans - Los Angeles, California, 2020. *MMWR Morb Mortal Wkly Rep.* 2020;69(21):651-655.
39. Hart WS, Maini PK, Thompson RN. High infectiousness immediately before COVID-19 symptom onset highlights the importance of continued contact tracing. *Elife.* 2021;10:e65534.
40. Li R, Pei S, Chen B, et al. Substantial undocumented infection facilitates the rapid dissemination of novel coronavirus (SARS-CoV-2). *Science.* 2020;368(6490):489-493.
41. Stanley S, Hamel DJ, Wolf ID, et al. Limit of Detection for Rapid Antigen Testing of the SARS-CoV-2 Omicron and Delta Variants of Concern Using Live-Virus Culture. *J Clin Microbiol.* 2022;60(5):e00140-00122.
42. FDA. SARS-CoV-2 reference panel comparative data. 2020; <https://www.fda.gov/medical-devices/coronavirus-covid-19-and-medical-devices/sars-cov-2-reference-panel-comparative-data>. Accessed March 8 2023.
43. Viloría Winnett A, Akana R, Shelby N, et al. Extreme differences in SARS-CoV-2 viral loads among respiratory specimen types during presumed pre-infectious and infectious periods. *PNAS Nexus.* 2023;10.1093/pnasnexus/pgad1033.
44. Savela ES, Viloría Winnett A, Romano AE, et al. Quantitative SARS-CoV-2 Viral-Load Curves in Paired Saliva Samples and Nasal Swabs Inform Appropriate Respiratory Sampling Site and Analytical Test Sensitivity Required for Earliest Viral Detection. *J Clin Microbiol.* 2022;60(2):e0178521.
45. Ke R, Martinez PP, Smith RL, et al. Daily longitudinal sampling of SARS-CoV-2 infection reveals substantial heterogeneity in infectiousness. *Nat Microbiol.* 2022;7(5):640-652.
46. Adamson B, Sikka R, Wyllie AL, Premstrut P. Discordant SARS-CoV-2 PCR and Rapid Antigen Test Results When Infectious: A December 2021 Occupational Case Series. *medRxiv.* 2022:2022.2001.2004.22268770.
47. Lai J, German J, Hong F, et al. Comparison of Saliva and Midturbinate Swabs for Detection of SARS-CoV-2. *Microbiol Spectr.* 2022;10(2):e0012822.
48. Lin J, Frediani JK, Damhorst GL, et al. Where is Omicron? Comparison of SARS-CoV-2 RT-PCR and Antigen Test Sensitivity at Commonly Sampled Anatomic Sites Over the Course of Disease. *medRxiv.* 2022:2022.2002.2008.22270685.
49. Killingley B, Mann AJ, Kalinova M, et al. Safety, tolerability and viral kinetics during SARS-CoV-2 human challenge in young adults. *Nat Med.* 2022;28(5):1031-1041.
50. Viloría Winnett A, Akana R, Shelby N, et al. Why Daily SARS-CoV-2 Nasal Rapid Antigen Testing Poorly Detects Infected and Infectious Individuals. *medRxiv.* 2022:MEDRXIV/2022/277513.
51. Smith RL, Gibson LL, Martinez PP, et al. Longitudinal Assessment of Diagnostic Test Performance Over the Course of Acute SARS-CoV-2 Infection. *J Infect Dis.* 2021;224(6):976-982.

52. Chu VT, Schwartz NG, Donnelly MAP, et al. Comparison of Home Antigen Testing With RT-PCR and Viral Culture During the Course of SARS-CoV-2 Infection. *JAMA Intern Med.* 2022;182(7):701-709.
53. Accorsi EK, Qiu X, Rumpler E, et al. How to detect and reduce potential sources of biases in studies of SARS-CoV-2 and COVID-19. *Eur J Epidemiol.* 2021;36(2):179-196.
54. Winnett AV, Porter MK, Romano AE, et al. Morning SARS-CoV-2 testing yields better detection of infection due to higher viral loads in saliva and nasal swabs upon waking. *Microbiology Spectrum.* 2022.
55. Danza P, Koo TH, Haddix M, et al. SARS-CoV-2 Infection and Hospitalization Among Adults Aged  $\geq 18$  Years, by Vaccination Status, Before and During SARS-CoV-2 B.1.1.529 (Omicron) Variant Predominance - Los Angeles County, California, November 7, 2021-January 8, 2022. *MMWR Morb Mortal Wkly Rep.* 2022;71(5):177-181.
56. Tennant PWG, Murray EJ, Arnold KF, et al. Use of directed acyclic graphs (DAGs) to identify confounders in applied health research: review and recommendations. *Int J Epidemiol.* 2020;50(2):620-632.
57. Leyland A, Groenewegen P. *Multilevel modelling for public health and health services research: health in context.* Springer Nature; 2020.
58. CLSI. *EP12-A2 User Protocol for Evaluation of Qualitative Test Performance, 2nd edition.* 2008.
59. STATA. Pairwise comparisons of margins. 2022; <https://www.stata.com/manuals13/rmarginspwcompare.pdf> and <https://www.stata.com/features/overview/pairwise-comparisons>.
60. CDC. Guidance for Antigen Testing for SARS-CoV-2 for Healthcare Providers Testing Individuals in the Community. 2022; <https://www.cdc.gov/coronavirus/2019-ncov/lab/resources/antigen-tests-guidelines.html>.
61. Winnett A, Cooper MM, Shelby N, et al. SARS-CoV-2 Viral Load in Saliva Rises Gradually and to Moderate Levels in Some Humans. *medRxiv.* 2020:2020.2012.2009.20239467.
62. Kissler SM, Fauver JR, Mack C, et al. Viral dynamics of acute SARS-CoV-2 infection and applications to diagnostic and public health strategies. *PLoS Biol.* 2021;19(7):e3001333.
63. Kissler SM, Fauver JR, Mack C, et al. Viral Dynamics of SARS-CoV-2 Variants in Vaccinated and Unvaccinated Persons. *N Engl J Med.* 2021;385(26):2489-2491.
64. Stankiewicz Karita HC, Dong TQ, Johnston C, et al. Trajectory of Viral RNA Load Among Persons With Incident SARS-CoV-2 G614 Infection (Wuhan Strain) in Association With COVID-19 Symptom Onset and Severity. *JAMA Netw Open.* 2022;5(1):e2142796.
65. Toth DJA, Beams AB, Keegan LT, et al. High variability in transmission of SARS-CoV-2 within households and implications for control. *PLoS One.* 2021;16(11):e0259097.
66. Tosif S, Haycroft ER, Sarkar S, et al. Virology and immune dynamics reveal high household transmission of ancestral SARS-CoV-2 strain. *Pediatr Allergy Immunol.* 2022;33(7).
67. Drain PK. Rapid Diagnostic Testing for SARS-CoV-2. *N Engl J Med.* 2022;386(3):264-272.
68. Connor BA, Rogova M, Garcia J, et al. Comparative Effectiveness of Single vs Repeated Rapid SARS-CoV-2 Antigen Testing Among Asymptomatic Individuals in a Workplace Setting. *JAMA Netw Open.* 2022;5(3):e223073.
69. Batteux E, Bonfield S, Jones LF, et al. Impact of residual risk messaging to reduce false reassurance following test-negative results from asymptomatic coronavirus (SARS-CoV-2) testing: an online experimental study of a hypothetical test. *BMJ Open.* 2022;12(3):e056533.

Supplemental Information for:

# **Index Cases First Identified by Nasal Swab Rapid COVID-19 Tests Had More Transmission to Household Contacts Than Cases Identified by Other Test Types**

Jenny Ji<sup>1†</sup>, Alexander Vioria Winnett BS<sup>1,2†</sup>, Natasha Shelby PhD<sup>1</sup>, Jessica A. Reyes MPH<sup>1</sup>, Noah W. Schlenker BS<sup>1</sup>, Hannah Davich MPH<sup>1</sup>, Saharai Caldera BS<sup>1</sup>, Colten Tognazzini BSN<sup>4</sup>, Ying-Ying Goh MD MPH<sup>4</sup>, Matthew Feaster PhD MPH<sup>4</sup>, Rustem F. Ismagilov PhD<sup>1\*</sup>

1. California Institute of Technology, Pasadena, CA, USA
1. University of California Los Angeles – California Institute of Technology Medical Scientist Training Program, Los Angeles, CA USA
2. University of California Los Angeles, Department of Biostatistics, Los Angeles, CA, USA
3. Pasadena Public Health Department, Pasadena, CA, USA

† These authors contributed equally to this report.

\*Correspondence to: Rustem F. Ismagilov, 1200 E. California Blvd., Pasadena, CA 91125, 626-395-8130, [rustem.admin@caltech.edu](mailto:rustem.admin@caltech.edu)

## **Contents**

Tables S1-S3

Supplemental Methods

Supplemental References

Detailed Author Contribution Statements

**Table S1. Participant Demographics by (A) Study Phase and (B) Infecting SARS-CoV-2 Variant Demographics, vaccination status, and index case testing type of the 85-household cohort divided by (A) study phase and (B) infecting viral variant.**

|                                       | (A) Study Phase |      |          |      | (B) Viral Variant |      |                    |      |
|---------------------------------------|-----------------|------|----------|------|-------------------|------|--------------------|------|
|                                       | Phase I         |      | Phase II |      | Omicron           |      | Ancestral Variants |      |
|                                       | N= 155          |      | N= 215   |      | N= 163            |      | N= 207             |      |
|                                       | n               | (%)  | n        | (%)  | n                 | (%)  | n                  | (%)  |
| <b>Self-Reported Gender Identity*</b> |                 |      |          |      |                   |      |                    |      |
| Man                                   | 70              | 45.2 | 104      | 48.4 | 78                | 47.9 | 96                 | 46.4 |
| Woman                                 | 85              | 54.8 | 111      | 51.6 | 85                | 52.1 | 111                | 53.6 |
| Third Gender                          | 0               | 0.0  | 0        | 0.0  | 0                 | 0.0  | 0                  | 0.0  |
| <b>Age Category</b>                   |                 |      |          |      |                   |      |                    |      |
| <10                                   | 29              | 18.7 | 28       | 13.0 | 20                | 12.3 | 37                 | 17.9 |
| 10 to 60                              | 115             | 74.2 | 173      | 80.5 | 129               | 79.1 | 159                | 76.8 |
| >60                                   | 11              | 7.1  | 14       | 6.5  | 14                | 8.6  | 11                 | 5.3  |
| <b>Self-Reported Race/Ethnicity**</b> |                 |      |          |      |                   |      |                    |      |
| Asian or Pacific Islander             | 11              | 7.1  | 36       | 16.7 | 31                | 19.0 | 16                 | 7.7  |
| Biracial                              | 8               | 5.2  | 8        | 3.7  | 6                 | 3.7  | 10                 | 4.8  |
| Black/African American                | 9               | 5.8  | 7        | 3.3  | 7                 | 4.3  | 9                  | 4.3  |
| Native American/Alaska                | 0               | 0.0  | 12       | 5.6  | 8                 | 4.9  | 4                  | 1.9  |
| Unknown                               | 61              | 39.4 | 66       | 30.7 | 44                | 27.0 | 83                 | 40.1 |
| White, Hispanic                       | 38              | 24.5 | 30       | 14.0 | 22                | 13.5 | 46                 | 22.2 |
| White, Non-Hispanic                   | 28              | 18.1 | 56       | 26.0 | 45                | 27.6 | 39                 | 18.8 |
| <b>Vaccination Status***</b>          |                 |      |          |      |                   |      |                    |      |
| Unvaccinated                          | 133             | 85.8 | 15       | 7.0  | 4                 | 2.5  | 144                | 69.6 |
| Partial                               | 3               | 1.9  | 2        | 0.9  | 2                 | 1.2  | 3                  | 1.4  |
| Complete                              | 1               | 0.6  | 77       | 35.8 | 52                | 31.9 | 26                 | 12.6 |
| Boosted                               | 0               | 0.0  | 79       | 36.7 | 71                | 43.6 | 8                  | 3.9  |
| Unknown                               | 18              | 11.6 | 42       | 19.5 | 34                | 20.9 | 26                 | 12.6 |
| <b>Household Size</b>                 |                 |      |          |      |                   |      |                    |      |
| <= 4                                  | 97              | 62.6 | 85       | 39.5 | 65                | 39.9 | 117                | 56.5 |
| > 4                                   | 58              | 37.4 | 130      | 60.5 | 98                | 60.1 | 90                 | 43.5 |
| <b>Index Case Test Type</b>           |                 |      |          |      |                   |      |                    |      |
| Rapid Nasal                           | 17              | 11.0 | 72       | 33.5 | 62                | 38.0 | 27                 | 13.0 |
| Not Rapid Nasal                       | 134             | 86.5 | 111      | 51.6 | 73                | 44.8 | 172                | 83.1 |
| Unknown                               | 4               | 2.6  | 32       | 14.9 | 28                | 17.2 | 8                  | 3.9  |

\*Both sex assigned at birth and current gender identity were self-reported by participants. One participant reported male assignment at birth and current gender identity of woman. Reported gender is listed.

\*\*63 individuals currently listed as 'Unknown' did not select a race category but wrote-in "Latino"/"Latina"/"Latinx."

\*\*\*Participants reported date and manufacturer of each vaccine dose received; vaccination status was defined only by doses received at least 7 days prior to enrollment in the study. Unvaccinated was defined as having received no COVID-19 vaccine doses. Partial vaccination was defined as receiving one dose of a multiple-dose series (e.g., Pfizer-BioNTech, Moderna). Complete vaccination was defined as receiving all doses of an initial COVID-19 vaccine series. Boosted was defined as the participant receiving any dose beyond an initial COVID-19 vaccine series.

**Table S2. Univariable Model.** Simple Odds Ratios (OR) for covariables included in the models in Fig 2.

| Exposure                            | Univariable Model |            |                          |      |                    |           |
|-------------------------------------|-------------------|------------|--------------------------|------|--------------------|-----------|
|                                     | SAR (%)           | 95% CI (%) | Pairwise Comparison Test | OR   | 95% CI             | Wald Test |
| <b>Age Category</b>                 |                   |            |                          |      |                    |           |
| <10                                 | 41.4              | 23.5-59.3  | NA                       | 1.22 | 0.55-2.70          | P=0.63    |
| 10 to 60                            | 36.7              | 29.8-43.6  |                          | 1.00 | <i>(Reference)</i> |           |
| >60                                 | 7.1               | 0.0-20.6   |                          | 0.13 | 0.02-1.04          | P=0.05    |
| <b>Race/Ethnicity</b>               |                   |            |                          |      |                    |           |
| Asian/PI                            | 30.3              | 14.6-46.0  | NA                       | 0.91 | 0.37-2.25          | P=0.84    |
| Biracial                            | 33.3              | 6.66-60.0  |                          | 1.05 | 0.28-3.87          | P=0.94    |
| Black                               | 21.4              | 0.0-42.9   |                          | 0.57 | 0.14-2.27          | P=0.43    |
| Native American                     | 12.5              | 0.0-35.4   |                          | 0.30 | 0.03-2.59          | P=0.27    |
| Unknown                             | 43.4              | 30.1-56.7  |                          | 1.61 | 0.76-3.41          | P=0.22    |
| White Hispanic                      | 43.5              | 29.2-57.8  |                          | 1.61 | 0.74-3.52          | P=0.23    |
| White Non-Hispanic                  | 32.3              | 20.9-43.7  |                          | 1.00 | <i>(Reference)</i> |           |
| <b>Viral Variant</b>                |                   |            |                          |      |                    |           |
| Ancestral                           | 34.6              | 26.4-42.8  | P=0.75                   | 1.00 | <i>(Reference)</i> |           |
| Omicron                             | 36.6              | 27.2-46.0  |                          | 1.09 | 0.63-1.88          | P=0.75    |
| <b>Vaccination Status</b>           |                   |            |                          |      |                    |           |
| Not Vaccinated                      | 38.5              | 29.1-47.8  | P=0.40                   | 1.00 | <i>(Reference)</i> |           |
| Vaccinated*                         | 33.1              | 24.9-41.3  |                          | 0.79 | 0.46-1.36          | P=0.40    |
| <b>Household Density</b>            |                   |            |                          |      |                    |           |
| ≤4                                  | 24.1              | 16.2-32.0  | P<0.001                  | 1.00 | <i>(Reference)</i> |           |
| >4                                  | 46.2              | 37.3-55.2  |                          | 2.71 | 1.54-4.75          | P=0.001   |
| <b>Infection Control Practice**</b> |                   |            |                          |      |                    |           |
| Not sharing food                    | 39.0              | 29.4-48.6  | P=0.53                   | 1.19 | 0.69-2.05          | P=0.53    |
| Not eating meals together           | 30.8              | 23.2-38.3  | P=0.01                   | 0.49 | 0.28-0.86          | P=0.01    |
| Not sharing a bedroom               | 30.2              | 23.4-37.1  | P<0.001                  | 0.30 | 0.16-0.58          | P<0.001   |
| Not sharing a bathroom              | 26.8              | 18.0-35.6  | P=0.005                  | 0.46 | 0.26-0.81          | P=0.007   |
| Not share personal items            | 33.8              | 25.9-41.7  | P=0.24                   | 0.72 | 0.41-1.25          | P=0.24    |
| Avoid contact with clothes          | 34.5              | 26.7-42.2  | P=0.34                   | 0.76 | 0.43-1.33          | P=0.33    |
| Social distancing                   | 31.2              | 23.1-39.3  | P=0.05                   | 0.58 | 0.33-1.01          | P=0.05    |
| Mask use                            | 32.3              | 24.4-40.3  | P=0.10                   | 0.62 | 0.36-1.09          | P=0.10    |
| <b>Index Case Diagnostic Test</b>   |                   |            |                          |      |                    |           |
| Rapid Nasal Test                    | 50.9              | 37.9-63.9  | P=0.003                  | 2.61 | 1.39-4.91          | P=0.003   |
| Other Test Type                     | 28.4              | 21.1-35.6  |                          | 1.00 | <i>(Reference)</i> |           |

**Table S3. Association of Test Type Subcategories with SARS-CoV-2 Transmission Among Household Contacts.** Provides data and Odds Ratios (OR) on the association between COVID-19 test type used to identify the household index case and subsequent transmission to household contacts.

| Exposure                 | Uninfected |      | Secondary Case |      | Multivariable Model |           |      |                    | Likelihood Ratio Test |
|--------------------------|------------|------|----------------|------|---------------------|-----------|------|--------------------|-----------------------|
|                          | N          | (%)  | N              | (%)  | aSAR                | 95% CI    | aOR  | 95% CI             |                       |
| <b>Test Type</b>         | <b>149</b> |      | <b>82</b>      |      |                     |           |      |                    |                       |
| Nasal Rapid              | 28         | 18.8 | 31             | 37.8 | 48.1                | 32.6-63.5 | 1.00 | <i>(Reference)</i> |                       |
| Nasal Not Rapid          | 37         | 24.8 | 7              | 8.5  | 16.2                | 4.59-27.8 | 0.13 | 0.03-0.51          | P=0.003               |
| Nasopharyngeal Rapid     | 17         | 11.4 | 4              | 4.9  | 19.5                | 0.25-38.7 | 0.17 | 0.03-1.06          | P=0.06                |
| Nasopharyngeal Not Rapid | 31         | 20.8 | 15             | 18.3 | 33.1                | 18.0-48.2 | 0.43 | 0.11-1.61          | P=0.21                |
| Oral Rapid               | 1          | 0.7  | 3              | 3.7  | 43.9                | 0.0-98.4  | 0.80 | 0.04-18.01         | P=0.89                |
| Oral Not Rapid           | 17         | 11.4 | 10             | 12.2 | 43.4                | 20.7-66.1 | 0.78 | 0.15-3.88          | P=0.76                |
| Unknown                  | 18         | 12.1 | 12             | 14.6 | 45.9                | 26.9-64.9 | 0.89 | 0.24-3.28          | P=0.86                |

## Supplemental Methods

### *Participants*

Individuals fluent in English or Spanish aged 6 years and older from households of two or more persons were eligible for participation if at least one household member had tested positive, developed COVID-19-like symptoms,<sup>1</sup> or had a known exposure with a SARS-CoV-2 infected individual within 7 days, and at least one other household member had either negative or unknown infection status during screening.

Upon enrollment, participants completed a questionnaire to provide information about demographics (based on the 2019 California Health Interview Survey tool)<sup>2</sup>, medical information, and COVID-19 history (e.g., COVID-19-like symptoms<sup>1</sup>, positive and negative test results, and COVID-19 vaccination information). For participants enrolled prior to February 22, 2021, vaccination was not asked, but unvaccinated status was inferred based on local vaccine availability.<sup>3</sup> Vaccination status was defined only by doses received at least 7 days prior to enrollment. The questionnaire also asked about household size, the age and gender of other household members and their SARS-CoV-2 infection status, as well as current and anticipated infection-control practices (e.g., shared items and spaces, disinfection, distancing, and masking).

### *Sample collection*

In Phase I of the study, participants self-collected either saliva or paired saliva and anterior-nares nasal swabs every morning upon waking and in the evening before bed in Spectrum SDNA 1000 devices.<sup>4</sup> In Phase II, participants self-collected paired saliva, anterior-nares nasal swabs, and oropharyngeal swabs in Zymo Research's SafeCollect devices<sup>5,6</sup> once daily (upon enrollment and thereafter each morning upon waking).

## Supplemental References

1. CDC. Symptoms of Coronavirus. 2020;<https://www.cdc.gov/coronavirus/2019-ncov/symptoms-testing/symptoms.html>.
2. UCLA. California Health Interview Survey: 2019 Adult CAWI Questionnaire 2019.
3. LA County Public Health. Los Angeles County Public Health COVID-19 Vaccine Dashboard. 2022; <http://publichealth.lacounty.gov/media/coronavirus/vaccine/vaccine-dashboard.htm>.
4. FDA. Emergency use authorization (EUA) review memorandum sdna-1000 saliva collection device. 2021; <https://www.fda.gov/media/142907/download>.
5. Zymo Research. SafeCollect Saliva Collection Kit User Instruction Manual. 2021; [https://files.zymoresearch.com/protocols/r1211e-dna\\_rna\\_shield\\_safecollect\\_saliva\\_collection\\_kit\\_user\\_instructions.pdf](https://files.zymoresearch.com/protocols/r1211e-dna_rna_shield_safecollect_saliva_collection_kit_user_instructions.pdf).
6. Zymo Research. SafeCollect Swab Collection Kit User Instruction Manual. 2021; [https://files.zymoresearch.com/protocols/r1160\\_r1161-dna\\_rna\\_shield\\_safecollect\\_swab\\_collection\\_kit\\_user\\_instructions.pdf](https://files.zymoresearch.com/protocols/r1160_r1161-dna_rna_shield_safecollect_swab_collection_kit_user_instructions.pdf).

## DETAILED AUTHOR CONTRIBUTION STATEMENTS

*Listed alphabetically by surname*

Saharai Caldera (SC)- Study coordinator; recruited, enrolled and maintained study participants with NS, JAR, HD and NWS; study-data quality control; validated data provided by participants in study instruments.

Hannah Davich (HD)- Lead study coordinator; recruited, enrolled and maintained study participants with NS, JAR, SC and NWS; developed recruitment strategies and did outreach with NS; study-data quality control; validated data provided by participants in study instruments; Compiled data from screening with NS for use in Fig 1B. Compiled data for household size and density metrics.

Matthew Feaster (MF)- Co-investigator; contributed to overall study design and recruitment strategies; provided guidance and expertise on SARS-CoV-2 epidemiology and local trends. Contributed to design of biostatistical analysis, particularly conceptualization of causal model represented in Fig 1C and parameterization/coding of covariables. Technical guidance on analysis method and interpretation. Reviewed manuscript.

Ying-Ying Goh (YYG)- Co-investigator; contributed to overall study design and recruitment strategies; provided guidance and expertise on SARS-CoV-2 epidemiology and local trends.

Rustem F. Ismagilov (RFI)- Principal investigator; provided leadership, technical guidance, oversight of all analyses, and was responsible for obtaining the primary funding for the study.

Jenny Ji (JJ)- Conceptualization of study with AVW and RFI. Performed extensive literature search on household transmission and co-wrote enrollment questionnaire with AW and NS. Data curation. Performed preliminary analyses. Coded and cleaned data from participant questionnaires. Validated underlying data. Parameterization of participant data for analysis. Assigned index case with AVW, NS, and NWS. Performed analyses in STATA. Prepared Figure 1, 2 and 3 with AVW. Prepared Table 1 with AVW. Study-specific literature review with AVW. Outlined manuscript with AVW. Revised manuscript with AVW.

Jessica A. Reyes (JAR)- Lead study coordinator; recruited, enrolled and maintained study participants with NS, HD, SC, and NWS; study-data quality control; validated data provided by participants in study instruments.

Natasha Shelby (NS)- Study administrator; contributed to initial study design and recruitment strategies; co-wrote enrollment questionnaire with AW and JJ; hired, trained, and supervised the study-coordinator team; recruited, enrolled and maintained study participants with JAR, JAR, NWS, HD and SC; study-data quality control; validated data provided by participants in study instruments; data curation; organized archiving of participant data; helped assemble CONSORT diagram (Fig 1B); assisted with assignment of household index cases with JJ, AVW, and NWS; managed reference library; reviewed and edited the manuscript.

Noah W. Schlenker (NWS)- Study coordinator; recruited, enrolled and maintained study participants with NS, JAR, HD and SC; study-data quality control; validated data provided by participants in study instruments; major role in assignment of household index cases with JJ, AVW, and NS.

Colten Tognazzini (CT)- Coordinated the recruitment efforts at PPHD with case investigators and contact tracers; provided guidance and expertise on SARS-CoV-2 epidemiology and local trends.

Alexander Vioria Winnett (AVW)- Conceptualization of study with JJ and RFI. Contributed to overall study design and recruitment strategies. Co-wrote enrollment questionnaire with NS and JJ; Data curation and analysis. Assigned vaccination status for each participant. Assigned infection status from viral load data. Assigned index case with JJ, NS, and NWS. Prepared Figure 1, 2 and 3 with JJ. Prepared Table 1 with JJ. Verified underlying data and analyses performed by JJ. Study-specific literature review with JJ. Outlined manuscript with JJ. Drafted initial manuscript. Revised manuscript with JJ.



## Contact information and ORCiDs:

Jenny JI, [jjj@caltech.edu](mailto:jjj@caltech.edu), 626-395-3464

ORCID: 0000-0002-7901-5605

Alexander VILORIA WINNETT, [awinnett@caltech.edu](mailto:awinnett@caltech.edu), 626-395-3464

ORCID: 0000-0002-7338-5605

Natasha SHELBY, [tshelby@caltech.edu](mailto:tshelby@caltech.edu), 626-395-3464

ORCID: 0000-0001-9097-3663

Jessica A. REYES, [jayrey628@gmail.com](mailto:jayrey628@gmail.com), 626-395-3464

ORCID: 0000-0002-5507-7633

Noah W. SCHLENKER, [noahschlenker@gmail.com](mailto:noahschlenker@gmail.com), 626-395-3464

ORCID: 0000-0002-8581-4403

Hannah DAVICH, [hannahdavich@gmail.com](mailto:hannahdavich@gmail.com), 626-395-3464

ORCID: 0000-0001-6880-3086

Saharai CALDERA, [calderasaharai@gmail.com](mailto:calderasaharai@gmail.com). 626-395-3464

ORCID: 0000-0001-5057-9186

Colten TOGNAZZINI, [ctognazzini@cityofpasadena.net](mailto:ctognazzini@cityofpasadena.net), 626-744-6000

ORCID: 0000-0002-2754-3588

Ying-Ying GOH, [yguh@cityofpasadena.net](mailto:yguh@cityofpasadena.net), 626-744-6000

ORCID: 0000-0001-5136-7214

Matthew FEASTER, [mfeaster@cityofpasadena.net](mailto:mfeaster@cityofpasadena.net), 626-744-6000

ORCID: 0000-0001-9966-2845

\*Corresponding author: Rustem F. ISMAGILOV, [rustem.admin@caltech.edu](mailto:rustem.admin@caltech.edu), 626-395-8130

ORCID: 0000-0002-3680-4399
